# Supplementary material for: Complex Hippocampal Response to Thermal Skin Injury and Protocols with Hyperbaric Oxygen Therapy and Filipendula ulmaria Extract in Rats
Source: MDPI journal article supplement (doi:10.3390/ijms25053033), 2024-03-06
Supplement: s1 [file s1]

**Supplement Table S1.** RT-PCR primers used in this study.

|                     | <b>Forward</b>                 | <b>Reverse</b>                    |
|---------------------|--------------------------------|-----------------------------------|
| $\beta$ -actin      | AAGATCCTGACCGAGCGTGG           | CAGCACTGTGTTGGCATAGAGG            |
| Bcl-2               | TGTGGATGACTGACTACCTGAACC       | CAGCCAGGAGAAATCAAACAGAGG          |
| Bax                 | CGGCGAATTGGAGATGAACTGG         | CTAGCAAAGTAGAAGAGGGCAACC          |
| GABA-AR $\alpha$ 2S | TTA CAG TCC AAG CCG AAT GTC CC | ACT TCT GAG GTT GTG TAA GCG TAG C |
| BDNF                | AGCTGAGCGTGTGTGACAGT           | ACCCATGGGATTACACTTGG              |
| IL-6                | TCCTACCCCAACTTCCAATGCTC        | TTGGATGGTCTTGGTCCTTAGCC           |
| TNF- $\alpha$       | AAATGGGCTCCCTCTCATCAGTTC       | TCTGCTTGGTGGTTTGCTACGAC           |
| MOR                 | CATATTCACCCTCTGCAC             | TTACAGGCAGACCGATG                 |
| DOR                 | TTACAGGCAGACCGATG              | ATGTTTGGAATCGTCCGGTACA            |
| KOR                 | TCTAGCTATTACTTCTGCATTG         | TGTGTTTCTAACTCTGTTTGT             |
| MT1                 | GCCACAGTCTCAAGTATGATAGG        | GGTGACAAAGTTCCTGAAGTC             |
| MT2                 | CCTCTACATCAGCCTCATCTGGCT       | CTGCGAACATGGTTAGGAAACTGC          |
| NPY                 | TCTGCCTGTCCCACCAATG            | CAACGACAACAAGGGAAATGG             |
